# Supplementary material
Source: Royal Society of Chemistry journal article supplement (doi:10.1039/d6md00094k)

## Supporting Information

### New Roxadustat Amino Acid Drug Conjugation Derivatives: Molecular Docking, Molecular Dynamics Simulation and in vitro assay

#### Authors

**Marjan Samadi a, Azizollah Habibi\*<sup>b</sup>, Leila Karami c, Soroush Sardari d, Ramin Ebrahimi Kiasari e, Ghazaleh Ghavami f and Mohammad Shahcheragh g**

#### Affiliations

- a. Faculty of Chemistry, Kharazmi University, Daneshgah Square, Shahid Beheshti Street, KARAJ, P. Code 31979-37551, I. R. IRAN; <https://khu.ac.ir/en>; Email: marjansamadi@ymail.com.
- b. Reaserch Institute of Green Chemistry, Kharazmi University, No. 43; Mofatteh Street, Enghelab Ave, TEHRAN, P. Code 15719-14911, I. R. IRAN; <https://khu.ac.ir/en>; Email: habibi@khu.ac.ir.
- c. Department of cell and Molecular Biology, Faculty of Biological Sciences, Kharazmi University, Tehran, Iran; Email: l\_karami@khu.ac.ir.
- d. Drug Design and Bioinformatics Unit, Medical Biotechnology Department, Biotechnology Research Center, Pasteur Institute of Iran, 13198, Tehran, Iran; <https://en.pasteur.ac.ir/>; Email: ssardari@hotmail.com.
- e. Drug Design and Bioinformatics Unit, Medical Biotechnology Department, Biotechnology Research Center, Pasteur Institute of Iran, 13198, Tehran, Iran; <https://en.pasteur.ac.ir/>; Email: ramin\_ebrahimi\_k@yahoo.com
- f. Drug Design and Bioinformatics Unit, Medical Biotechnology Department, Biotechnology Research Center, Pasteur Institute of Iran, 13198, Tehran, Iran; <https://en.pasteur.ac.ir/>; Email: ghghavami@gmail.com
- g. Aprin Sama Pharmed company, Tehran, Iran; <https://aprinpharmed.com/en/>; Email: m.shahcheragh.oc@gmail.com

#### Corresponding author

<https://khu.ac.ir/en>;  
[marjansamadi@ymail.com](mailto:marjansamadi@ymail.com)

| Table of Contents                                   | Page |
|-----------------------------------------------------|------|
| Synthesis method                                    | S2   |
| <sup>1</sup> H NMR spectra for Roxadusta+Alanine    | S3   |
| <sup>1</sup> H NMR spectra for Roxadusta+Glycine    | S4   |
| <sup>1</sup> H NMR spectra for Roxadusta+Valine     | S5   |
| <sup>1</sup> H NMR spectra for Roxadusta+Leucine    | S6   |
| <sup>1</sup> H NMR spectra for Roxadusta+Serine     | S7   |
| <sup>1</sup> H NMR spectra for Roxadusta+Methionin  | S8   |
| <sup>13</sup> C NMR spectra for Roxadusta+Alanine   | S9   |
| <sup>13</sup> C NMR spectra for Roxadusta+Glycine   | S10  |
| <sup>13</sup> C NMR spectra for Roxadusta+Valine    | S11  |
| <sup>13</sup> C NMR spectra for Roxadusta+Leucine   | S12  |
| <sup>13</sup> C NMR spectra for Roxadusta+Serine    | S13  |
| <sup>13</sup> C NMR spectra for Roxadusta+Methionin | S14  |
| HRMS spectra for Roxadusta+Alanine                  | S15  |
| HRMS spectra for Roxadusta+Glycine                  | S16  |
| HRMS spectra for Roxadusta+Valine                   | S17  |
| HRMS spectra for Roxadusta+Leucine                  | S18  |
| HRMS spectra for Roxadusta+Serine                   | S19  |
| HRMS spectra for Roxadusta+Methionin                | S20  |

## Synthesis procedure

### Representative Procedure for the synthesis of (Roxadusta+AA):

1 gram of 2-CTC resin was poured into an appropriate glass vessel. 10 mL of DCM was added, and the mixture was shaken for 10 minutes, then the solution was filtered and washed with DCM. Next, 1 equivalent of Fmoc-Ala-OH, 1 equivalent of DIEA, and 10 mL of DMF were added. The mixture was shaken for 2 hours, then filtered and washed. To remove the Fmoc group, 16 mL of 25% piperidine in DMF was added, shaken for 20 minutes, and then the resin was washed with DMF and DCM. A Kaiser test was performed to ensure complete removal of the Fmoc group. Roxadustat was then loaded with the activation reagent HATU, and the mixture was shaken for 2 hours, then filtered. Finally, the product was cleaved from the resin using TFA, the filtrate was evaporated to concentrate it, and DEE was added to precipitate the obtained product.

**<sup>1</sup>H NMR spectra for compounds in manuscript:**

Rox-Ala

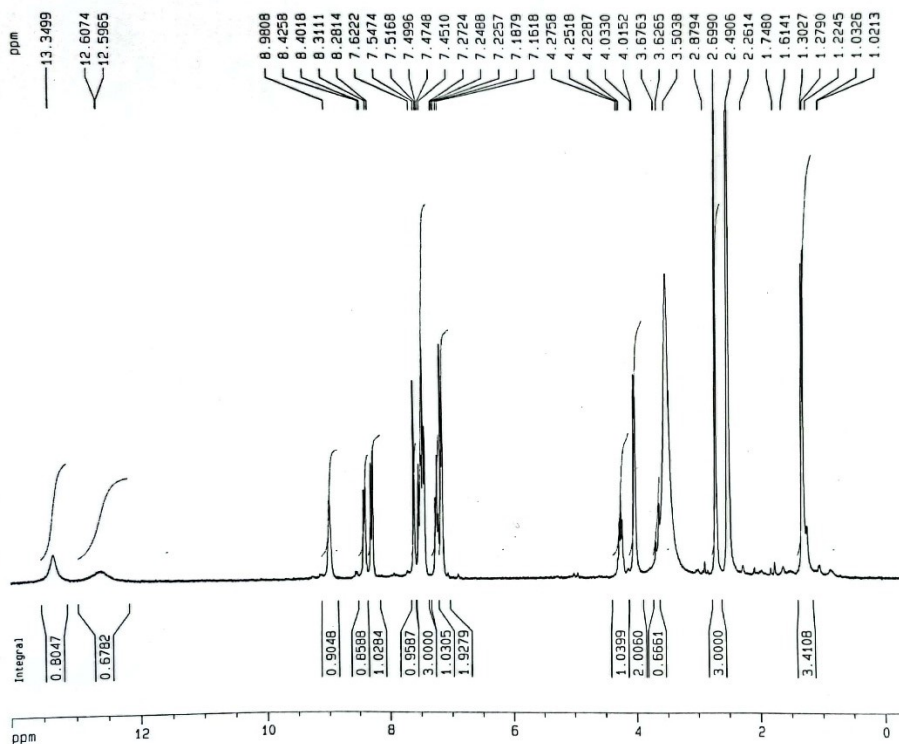

Current Data Parameters  
 NAME samadi-m  
 EXPNO 6  
 PROCNO 1

F2 - Acquisition Parameters  
 Date\_ 20240204  
 Time 11.15  
 INSTRUM spect  
 PROBHD 5 mm Multinuc1  
 PULPROG zg  
 TD 16384  
 SOLVENT DMSO  
 NS 16  
 DS 2  
 SWH 6172.839 Hz  
 FIDRES 0.376769 Hz  
 AQ 1.3271540 sec  
 RG 812.7  
 DW 81.000 usec  
 DE 6.00 usec  
 TE 300.0 K  
 D1 6.00000000 sec

\*\*\*\*\* CHANNEL f1 \*\*\*\*\*  
 NUC1 1H  
 P1 10.00 usec  
 PL1 0.00 dB  
 SF01 300.1315007 MHz

F2 - Processing parameters  
 SI 32768  
 SF 300.1299996 MHz  
 WDW EM  
 SSB 0  
 LB 0.30 Hz  
 GB 0  
 PC 1.00

ID NMR plot parameters  
 CX 20.00 cm  
 CY 25.00 cm  
 F1P 14.000 ppm  
 F1 4201.82 Hz  
 F2P -90.300 ppm  
 F2 -90.04 Hz  
 PPMCM 0.71500 ppm/cm  
 HZCM 214.59296 Hz/cm

FOX-GLY

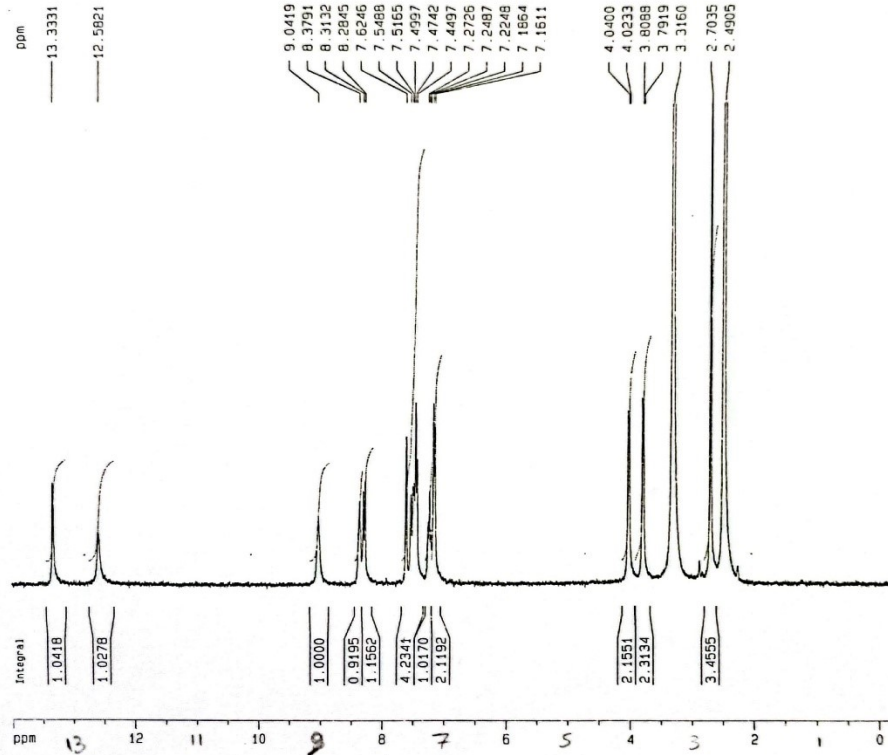

Current Data Parameters  
NAME senedi-m  
EXPNO 3  
PROCNO 1

F2 - Acquisition Parameters  
Date\_ 20130922  
Time 13:29  
INSTRUM spect  
PROBHD 5 mm Multinucl  
PULPROG zg  
TD 16384  
SOLVENT DMSO  
NS 16  
DS 2  
SWH 6172.839 Hz  
FIDRES 0.376750 Hz  
AQ 1.3271540 sec  
RG 1290.2  
DM 81.000 usec  
DE 5.00 usec  
TE 300.0 K  
D1 6.00000000 sec

\*\*\*\*\* CHANNEL f1 \*\*\*\*\*  
NUC1 1H  
P1 10.00 usec  
PL1 0.00 dB  
SFO1 300.1315007 MHz

F2 - Processing parameters  
SI 32768  
SF 300.1300009 MHz  
WDW EM  
SSB 0  
LB 0.30 Hz  
GB 0  
PC 1.00

1D NMR plot parameters  
CX 20.00 cm  
CY 50.00 cm  
F1P 14.000 ppm  
F1 4201.62 Hz  
F2P -0.300 ppm  
F2 -50.04 Hz  
FPMCM 0.71500 ppm/cm  
HZCM 214.59296 Hz/cm

Rox-Va1

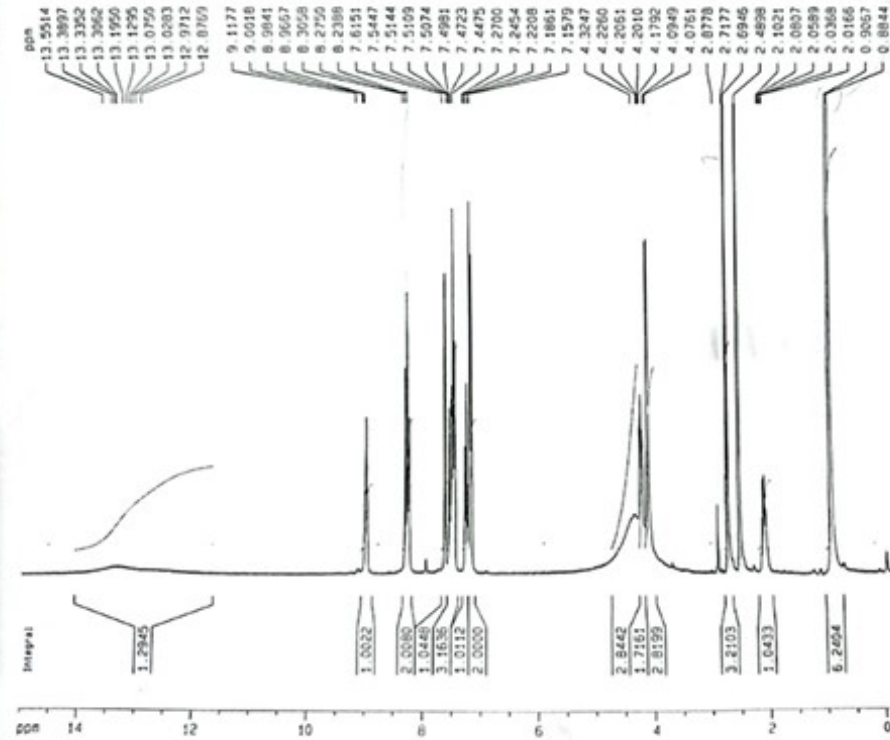

Current Data Parameters

NAME: uneditiv  
 EXPNO: 8  
 PROCNO: 1

F2 - Acquisition Parameters

Date\_: 20040504  
 Time: 11:41  
 INSTRUM: spect  
 PROBHD: 5 mm Multic1  
 PULPROG: zg  
 F0: 16384  
 SOLVENT: DMF0  
 NS: 16  
 DS: 2  
 SWH: 6172.839 Hz  
 FIDRES: 0.316760 Hz  
 AQ: 1.3271540 sec  
 RG: 574.7  
 DW: 81.000 usec  
 DE: 6.00 usec  
 TE: 300.0 K  
 D0: 6.00000000 sec

\*\*\*\*\* CHANNEL f1 \*\*\*\*\*

NUC1: 13C  
 P1: 10.00 usec  
 PL1: 0.00 dB  
 SFO1: 300.135007 MHz

F2 - Processing parameters

SF: 300.1300006 MHz  
 SI: 32768  
 SF0: 0  
 SSB: 0  
 LB: 0.30 Hz  
 GB: 0  
 PC: 1.00

SD NMR plot parameters

CX: 20.00 cm  
 CY: 25.00 cm  
 FXP: 15.000 ppm  
 FI: 4581.95 Hz  
 FXP: -0.300 ppm  
 F2: -90.04 Hz  
 WINW: 0.76500 ppm/cm  
 NZCM: 229.59944 Hz/cm

Rox-1eu

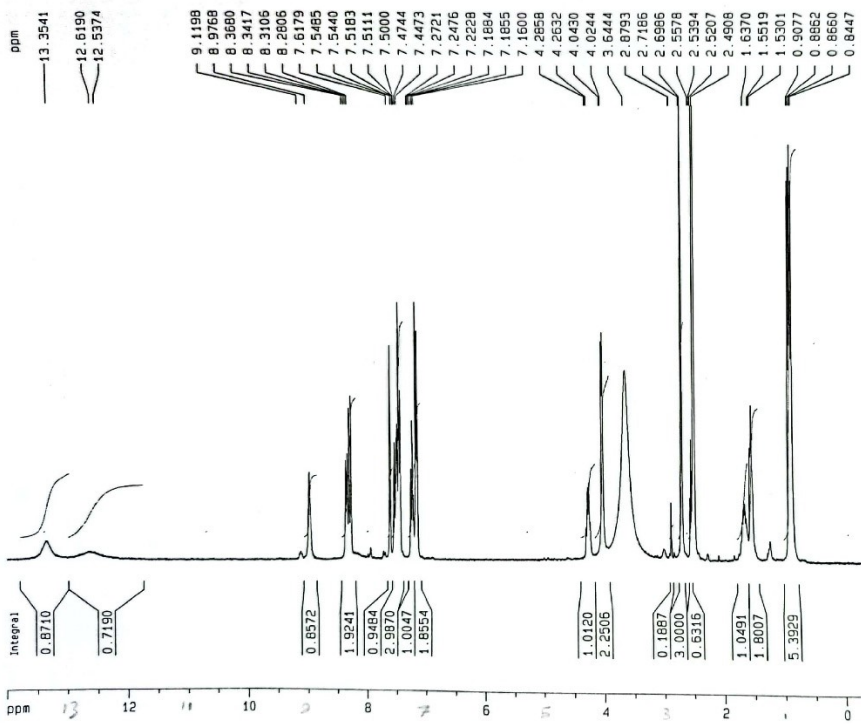

Current Data Parameters  
 NAME sanadi-m  
 EXPNO 7  
 PROCNO 1

F2 - Acquisition Parameters  
 Date\_ 20240204  
 Time 11.28  
 INSTRUM spect  
 PROBHD 5 mm Multinucl  
 PULPROG zg  
 TD 16384  
 SOLVENT DMSO  
 NS 15  
 DS 2  
 SWH 6172.839 Hz  
 FIDRES 0.376760 Hz  
 AQ 1.3271540 sec  
 RG 574.7  
 DW 81.000 usec  
 DE 6.00 usec  
 TE 300.0 K  
 D1 6.00000000 sec

\*\*\*\*\* CHANNEL f1 \*\*\*\*\*  
 NUC1 1H  
 P1 10.00 usec  
 PL1 0.00 dB  
 SFO1 300.1315007 MHz

F2 - Processing parameters  
 SI 32768  
 SF 300.1300005 MHz  
 WDW EM  
 SSB 0  
 LB 0.30 Hz  
 GB 0  
 PC 1.00

ID NMR plot parameters  
 CX 20.00 cm  
 CY 25.00 cm  
 F1P 14.000 ppm  
 F1 4201.82 Hz  
 F2P -0.300 ppm  
 F2 -90.04 Hz  
 PPRCM 0.71500 ppm/cm  
 HZCM 214.59296 Hz/cm

Rox-Ser

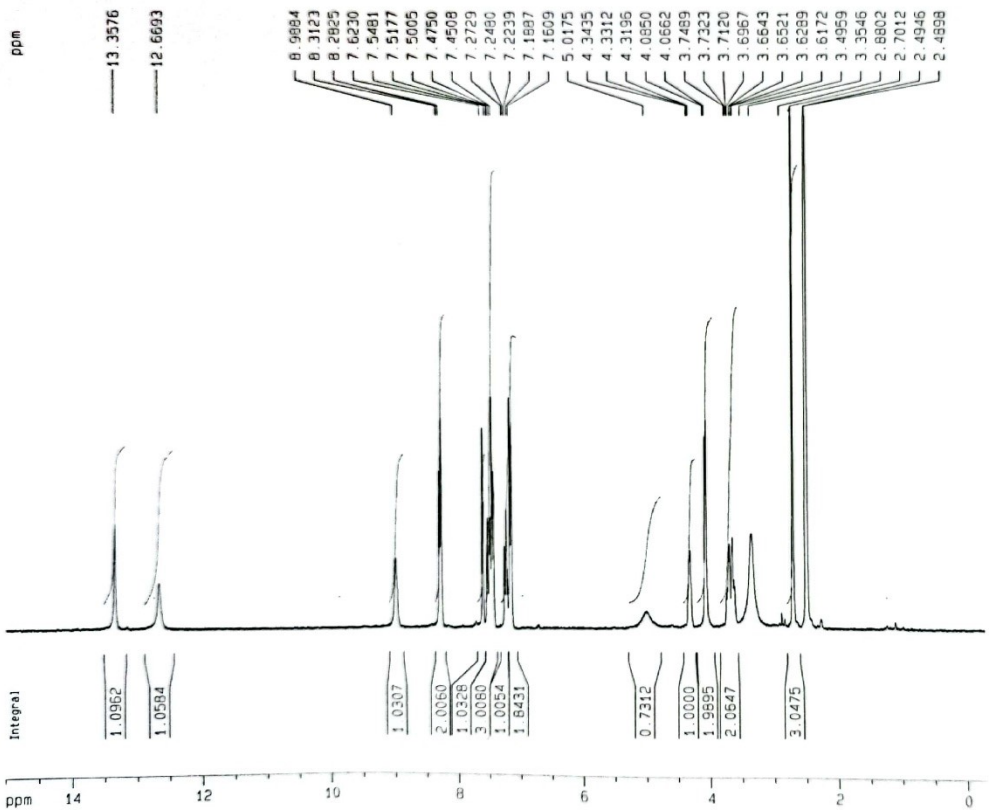

Current Data Parameters

NAME samedi-m  
EXPNO 9  
PROCNO 1

F2 - Acquisition Parameters

Date\_ 20240204  
Time 13 14  
INSTRUM spect  
PROBHD 5 mm Multinucl  
PULPROG zg  
TD 16384  
SOLVENT DMSO  
NS 16  
DS 2  
SWH 6172.839 Hz  
FIDRES 0.376750 Hz  
AQ 1.3271540 sec  
RG 912.3  
DW 81.000 usec  
DE 6.00 usec  
TE 300.0 K  
D1 6.00000000 sec

\*\*\*\*\* CHANNEL f1 \*\*\*\*\*

NUC1 1H  
P1 10.00 usec  
PL1 0.00 dB  
SFO1 300.1315007 MHz

F2 - Processing parameters

SI 32768  
SF 300.1300009 MHz  
WCM EM  
SSB 0  
LB 0.30 Hz  
GB 0  
PC 1.00

ID NMR plot parameters

CX 20.00 cm  
CY 25.00 cm  
F1P 15.000 ppm  
F1 4501.95 Hz  
F2P -0.300 ppm  
F2 -90.04 Hz  
PPMCM 0.76500 ppm/cm  
HZCM 229.59944 Hz/cm

Rox-Met

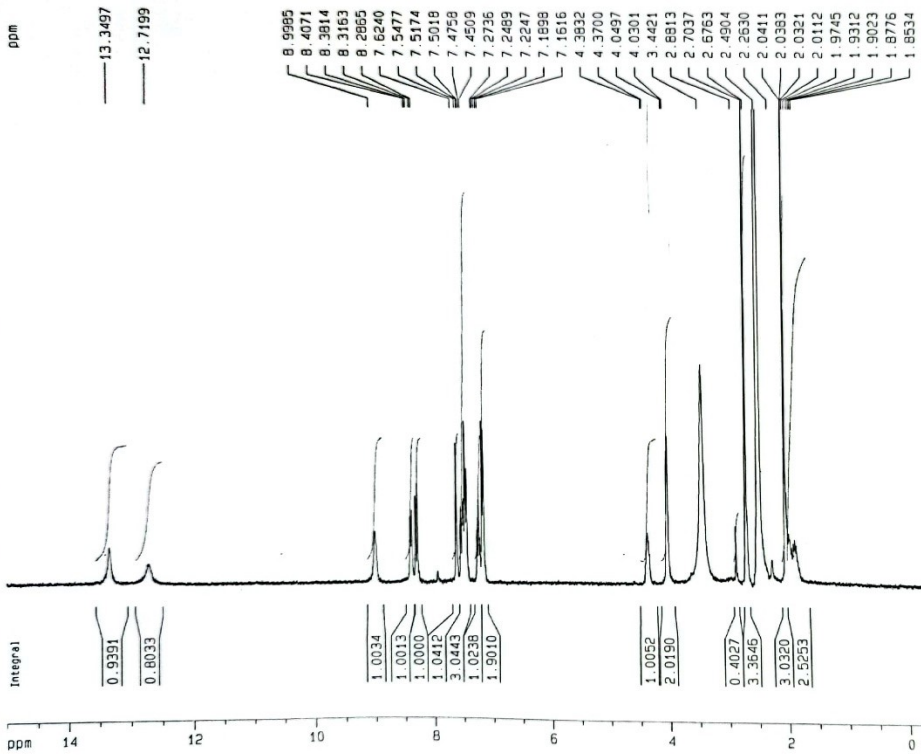

Current Data Parameters  
 NAME samadi-m  
 EXPNO 10  
 PROCNO 1

F2 - Acquisition Parameters  
 Date\_ 20240204  
 Time 13.26  
 INSTRUM spect  
 PROBHD 5 mm Multinucl  
 PULPROG zg  
 TD 16384  
 SOLVENT DMSO  
 NS 32  
 DS 2  
 SWH 6172.839 Hz  
 FIDRES 0.376760 Hz  
 AQ 1.3271540 sec  
 RG 812.7  
 DW 81.000 usec  
 DE 6.00 usec  
 TE 300.0 K  
 D1 6.00000000 sec

\*\*\*\*\* CHANNEL f1 \*\*\*\*\*  
 NUC1 1H  
 P1 10.00 usec  
 PL1 0.00 dB  
 SFO1 300.1315007 MHz

F2 - Processing parameters  
 SI 32768  
 SF 300.1300006 MHz  
 WDW EM  
 SSB 0  
 LB 0.30 Hz  
 GB 0  
 PC 1.00

1D NMR plot parameters  
 CX 20.00 cm  
 CY 50.00 cm  
 F1P 15.000 ppm  
 F1 4501.95 Hz  
 F2P -0.300 ppm  
 F2 -90.04 Hz  
 PRFMC 0.76800 ppm/cm  
 HZCM 229.59944 Hz/cm

<sup>13</sup>C NMR spectra for compounds in manuscript:

Rox-Ala

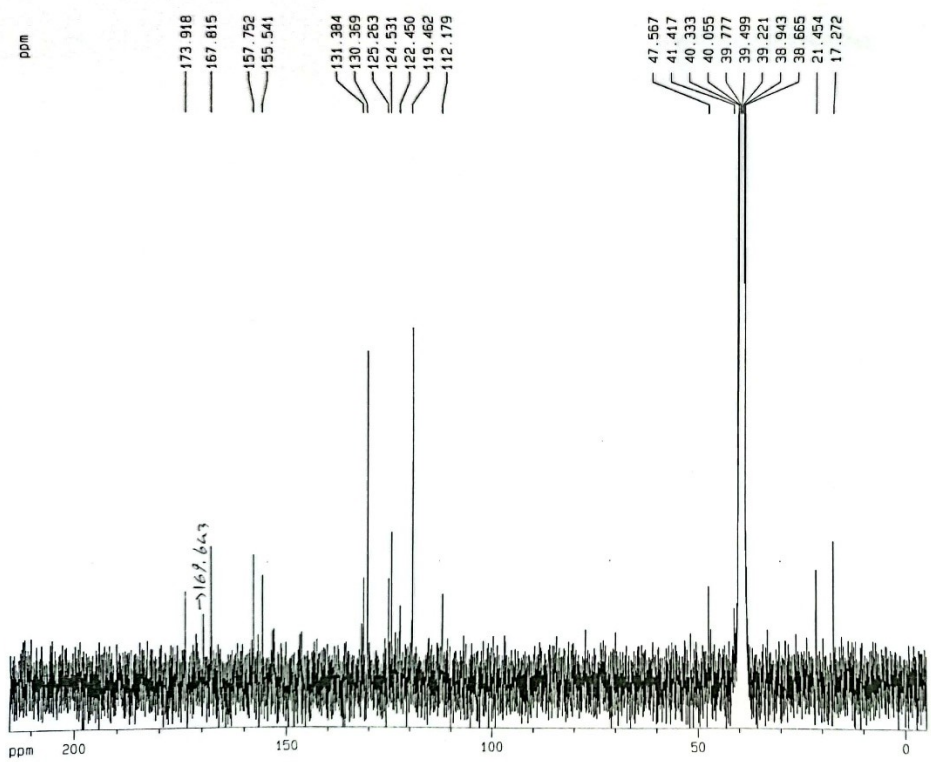

```

Current Data Parameters
NAME          samadi-m
EXPNO        12
PROCNO       1

F2 - Acquisition Parameters
Date_        20100215
Time         13.19
INSTRUM      spect
PROBHD       5 mm Multinucl
PULPROG      zgpg30
TD           32768
SOLVENT      DMSO
NS           10240
DS           2
SWH          17985.611 Hz
FIDRES       0.548877 Hz
AQ           0.9110004 sec
RG           23170.5
DM           27.800 usec
DE           6.00 usec
TE           300.0 K
D1           2.00000000 sec
d11          0.03000000 sec
d12          0.00020000 sec

----- CHANNEL f1 -----
NUC1          13C
P1            32.00 usec
PL1           2.00 dB
SF01          75.4752958 MHz

----- CHANNEL f2 -----
CPDPRG2      waltz16
NUC2          1H
PCPD2        80.00 usec
PL2           0.00 dB
PL12          15.00 dB
PL13          15.00 dB
SF02          300.1312005 MHz

F2 - Processing parameters
SI            65536
SF            75.4677849 MHz
WDW           EM
SSB           0
LB            1.00 Hz
GB            0
PC            1.40

ID NMR plot parameters
CX            20.00 cm
CY            400.00 cm
F1P           215.000 ppm
F1            16225.57 Hz
F2P           -5.000 ppm
F2            -377.34 Hz
PRNCM         11.00000 ppm/cm
HDCM          830.14563 Hz/cm
    
```

ROX-GLY repeat

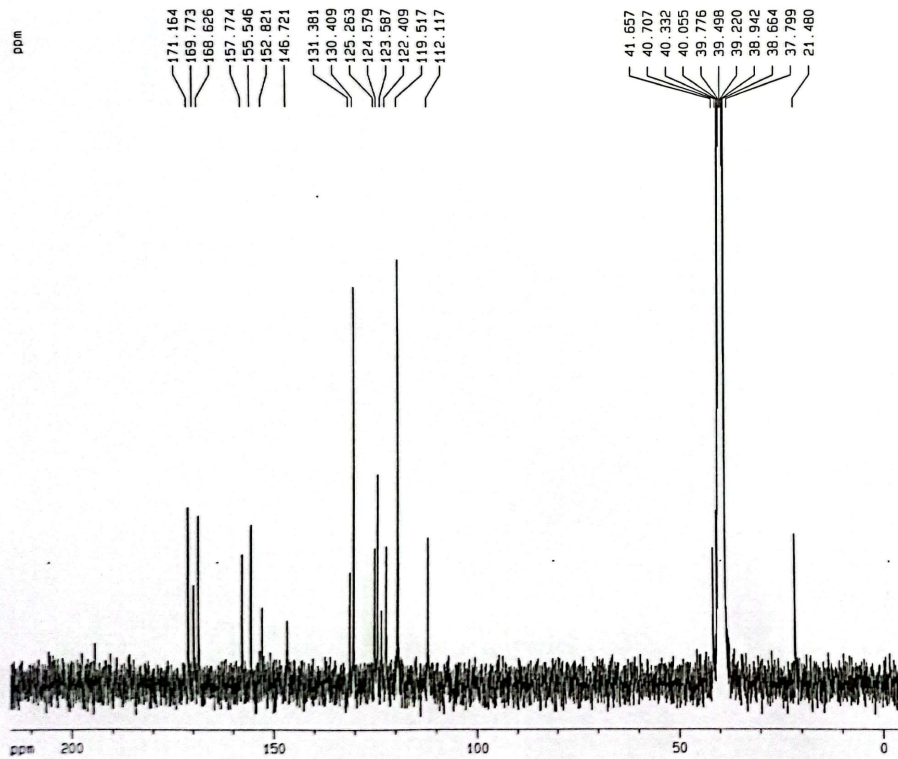

```

Current Data Parameters
NAME          samadi-m
EXPNO         5
PROCNO        1

F2 - Acquisition Parameters
Date_         20131019
Time          8.51
INSTRUM       spect
PROBHD        5 mm Multinucl
PULPROG       zgpg30
TD            32768
SOLVENT       DMSO
NS            6028
DS            2
SWH           17985.611 Hz
FIDRES        0.548877 Hz
AQ            0.9110004 sec
RG            23170.5
DM            27.800 usec
DE            6.00 usec
TE            300.0 K
D1            2.0000000 sec
d11           0.0300000 sec
d12           0.0002000 sec

----- CHANNEL f1 -----
NUC1          13C
P1            14.50 usec
PL1           2.00 dB
SFO1          75.4752958 MHz

----- CHANNEL f2 -----
CPOPRG2       waltz16
NUC2          1H
PCPD2         80.00 usec
PL2           0.00 dB
PL12          15.00 dB
PL13          15.00 dB
SFO2          300.1312005 MHz

F2 - Processing parameters
SI            65536
SF            75.4677803 MHz
WDW           EM
SSB           0
LB            1.00 Hz
GB            0
PC            1.40

1D NMR plot parameters
CX            20.00 cm
CY            100.00 cm
F1P           215.000 ppm
F1            16225.57 Hz
F2P           -5.000 ppm
F2            -377.34 Hz
PRFCH         11.00000 ppm/cm
HZCM          830.14557 Hz/cm
    
```

Rox-Va1

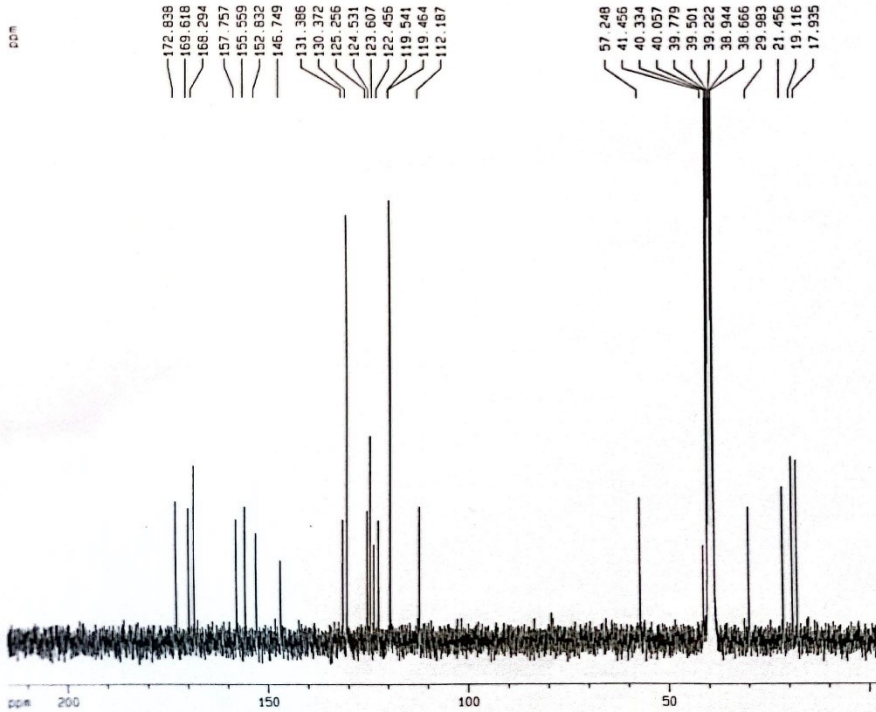

Current Data Parameters  
NAME sanad1-m  
EXPNO 15  
PROCNO 1

F2 - Acquisition Parameters  
Date\_ 20100223  
Time 20.21  
INSTRUM spect  
PROBHD 5 mm Multinucl  
PULPROG zgpg30  
TD 32768  
SOLVENT DMSO  
NS 10240  
DS 2  
SWH 17985.611 Hz  
FIDRES 0.548877 Hz  
AQ 0.9110004 sec  
RG 23170.5  
DM 27.800 usec  
DE 6.00 usec  
TE 300.0 K  
D1 2.0000000 sec  
d11 0.0300000 sec  
d12 0.0000200 sec

----- CHANNEL f1 -----  
NUC1 13C  
P1 32.00 usec  
PL1 2.00 dB  
SF01 75.4752958 MHz

----- CHANNEL f2 -----  
CPOPRG2 waltz16  
NUC2 1H  
PCPD2 80.00 usec  
PL2 0.00 dB  
PL12 15.00 dB  
PL13 15.00 dB  
SF02 300.1312005 MHz

F2 - Processing parameters  
SI 65536  
SF 75.4677841 MHz  
WDW EM  
SSB 0  
LB 1.00 Hz  
GB 0  
PC 1.40

ID NMR plot parameters  
CX 20.00 cm  
CY 200.00 cm  
FIP 215.000 ppm  
F1 16225.57 Hz  
F2 -2.000 ppm  
F2 -150.94 Hz  
PPMCM 10.85000 ppm/cm  
HZCM 818.82538 Hz/cm

Rox-Leu

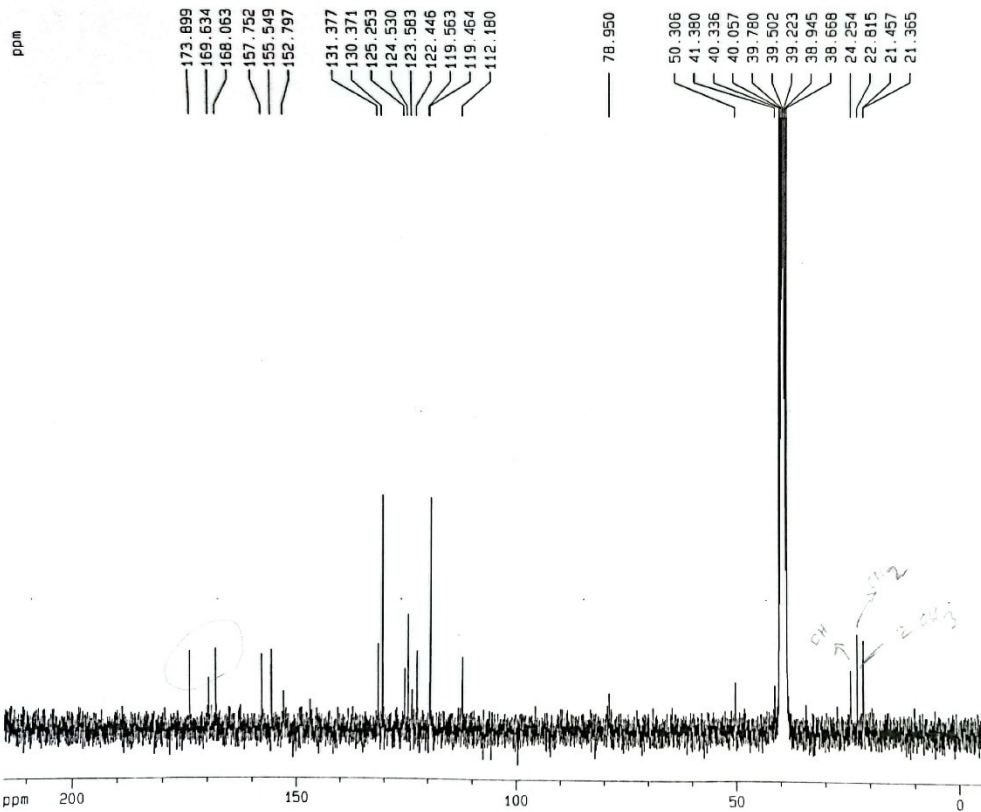

Current Data Parameters  
NAME sanadi-m  
EXPNO 11  
PROCNO 1

F2 - Acquisition Parameters  
Date\_ 20100212  
Time 11 31  
INSTRUM spect  
PROBHD 5 mm Multinucl  
PULPROG zgpg30  
TD 32768  
SOLVENT DMSO  
NS 10240  
DS 2  
SWH 17985.611 Hz  
FIDRES 0.546877 Hz  
AQ 0.9110004 sec  
RG 23170.5  
DW 27.800 usec  
DE 6.00 usec  
TE 300.0 K  
D1 2.00000000 sec  
d11 0.03000000 sec  
d12 0.00002000 sec

----- CHANNEL f1 -----  
NUC1 13C  
P1 32.00 usec  
PL1 2.00 dB  
SFO1 75.4752958 MHz

----- CHANNEL f2 -----  
CPOPRG2 waltz16  
NUC2 1H  
PCPD2 80.00 usec  
PL2 0.00 dB  
PL12 15.00 dB  
PL13 15.00 dB  
SFO2 300.1312005 MHz

F2 - Processing parameters  
SI 65536  
SF 75.4677846 MHz  
WDW EM  
SSB 0  
LB 1.00 Hz  
GB 0  
PC 1.40

1D NMR plot parameters  
CX 20.00 cm  
CY 200.00 cm  
F1P 215.000 ppm  
F1 16225.57 Hz  
F2P -5.000 ppm  
F2 -377.34 Hz  
PPNOM 11.00000 ppm/cm  
HZCM 830.14557 Hz/cm

Rox-ser

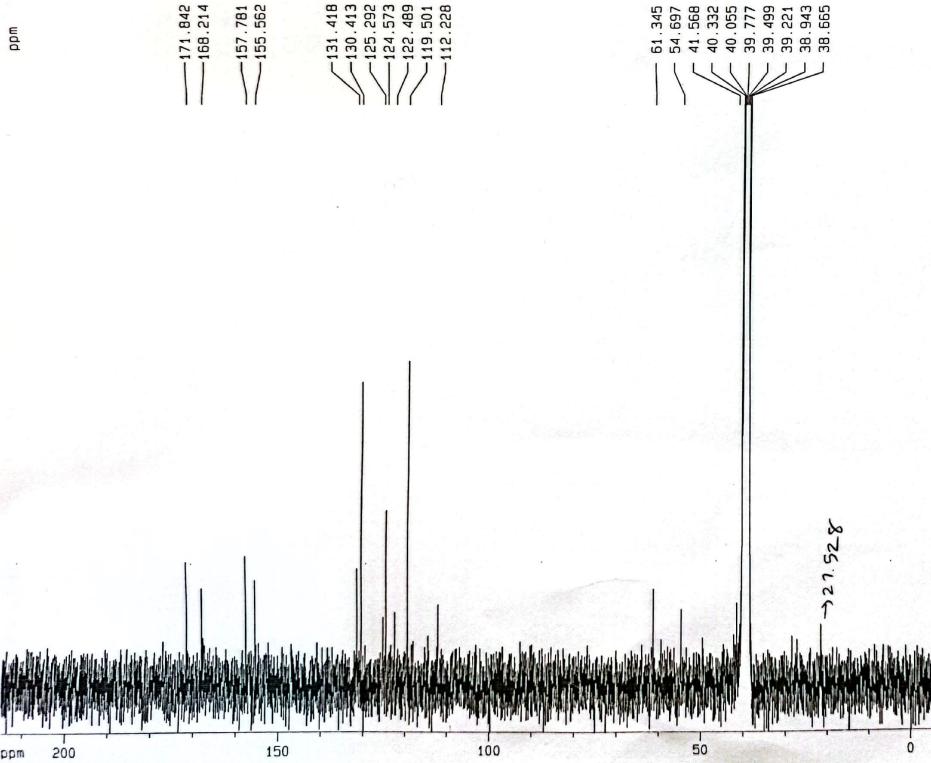

Current Data Parameters  
NAME samadim  
EXPNO 13  
PROCNO 1

F2 - Acquisition Parameters  
Date\_ 20100217  
Time 15.07  
INSTRUM spect  
PROBHD 5 mm Multinucl  
PULPROG zgpg30  
TD 32768  
SOLVENT DMSO  
NS 10240  
DS 2  
SWH 17985.611 Hz  
FIDRES 0.548877 Hz  
AQ 0.9110004 sec  
RG 23170.5  
DM 27.800 usec  
DE 6.00 usec  
TE 300.0 K  
D1 2.0000000 sec  
d11 0.0300000 sec  
d12 0.0000200 sec

----- CHANNEL f1 -----  
NUC1 13C  
P1 32.00 usec  
PL1 2.00 dB  
SFO1 75.4752558 MHz

----- CHANNEL f2 -----  
CPDPRG2 waltz16  
NUC2 1H  
PCPD2 80.00 usec  
PL2 0.00 dB  
PL12 15.00 dB  
PL13 15.00 dB  
SFO2 300.1312005 MHz

F2 - Processing parameters  
SI 65536  
SF 75.4677824 MHz  
WDW EM  
SSB 0  
LB 1.00 Hz  
GB 0  
PC 1.40

1D NMR plot parameters  
CX 20.00 cm  
CY 400.00 cm  
F1P 215.000 ppm  
F1 16225.57 Hz  
F2P -5.000 ppm  
F2 -377.34 Hz  
PPHMC 11.00000 ppm/cm  
HZCM 830.14257 Hz/cm

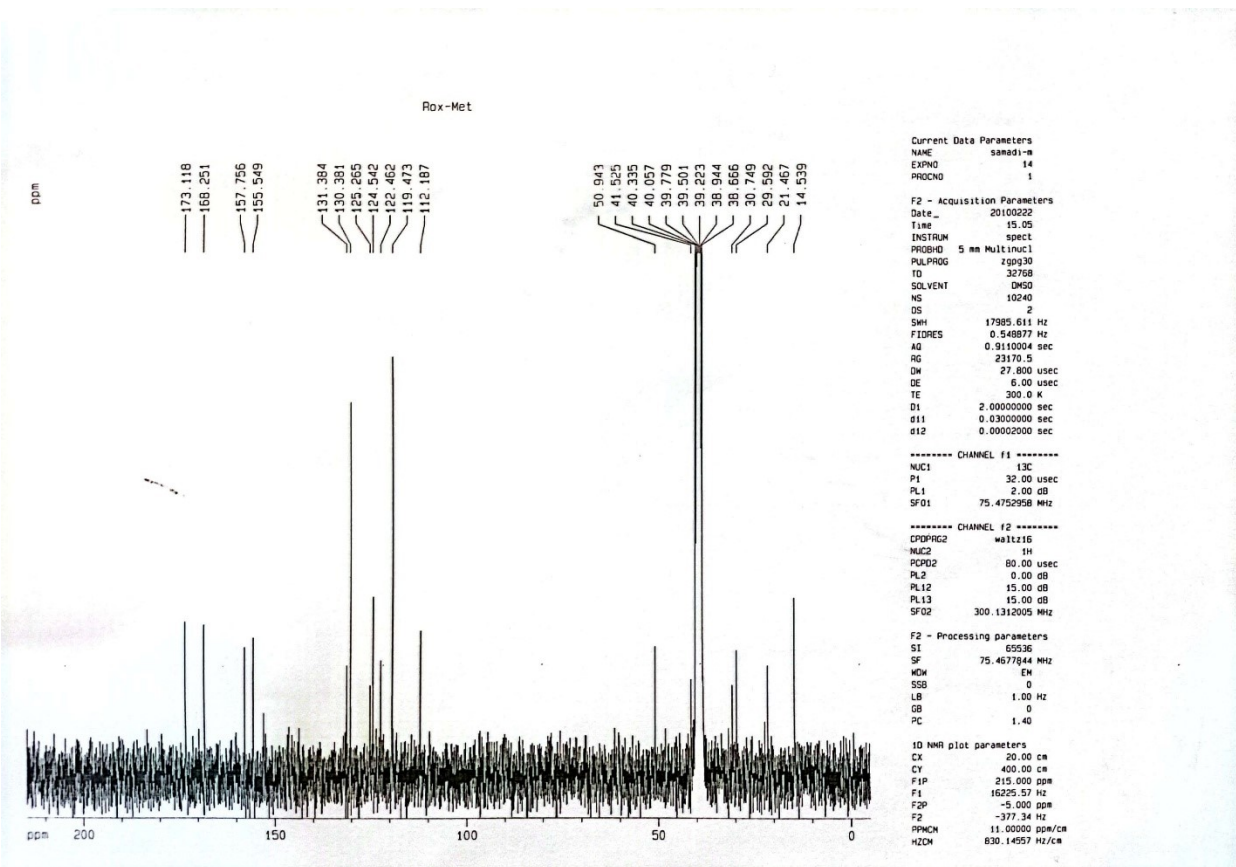

# HRMS spectra for compounds in manuscript:

## Spectrum Plot Report

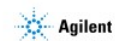

|              |                  |                |                          |            |              |                  |                    |
|--------------|------------------|----------------|--------------------------|------------|--------------|------------------|--------------------|
| Sample Name  | ROXADUSTAT-ALA   | Rack Position  |                          | Instrument | Instrument 1 | Acq Operator     |                    |
| Inj Vol (ul) | 10               | Plate Position |                          | IRM Status | Success      | Acq Time (Local) | 19-Sep-24 11:17:18 |
| Data File    | ROXADUSTAT-ALA.d | Acq Method     | APCI POS ION ACN<br>MS.m | Comment    |              | Acq Time (UTC)   | AM (UTC+04:00)     |

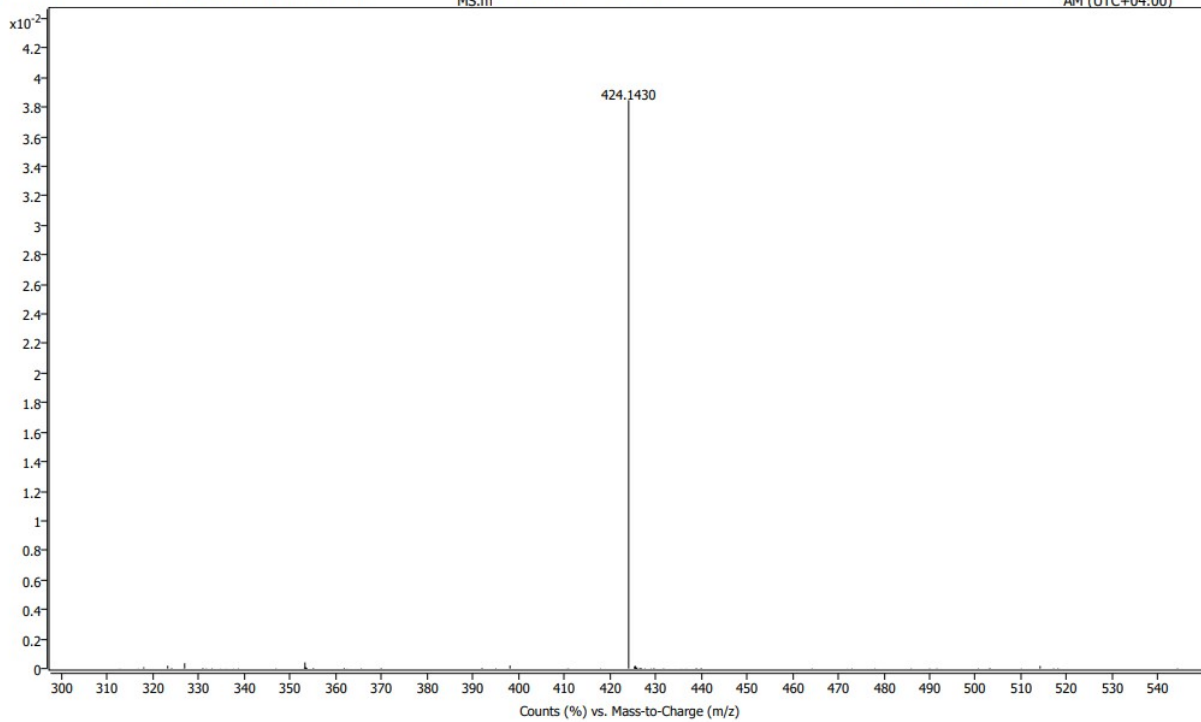

# Spectrum Plot Report

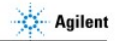

|              |                  |                |                          |              |                                                      |
|--------------|------------------|----------------|--------------------------|--------------|------------------------------------------------------|
| Sample Name  | ROXADUSTAT-GLY   | Rack Position  | Instrument               | Instrument 1 | Acq Operator                                         |
| Inj Vol (ul) | 10               | Plate Position | IRM Status               | Success      |                                                      |
| Data File    | ROXADUSTAT-GLY.d | Acq Method     | APCI POS ION ACN<br>MS.m | Comment      | Acq Time (Local) 19-Sep-24 9:53:33 AM<br>(UTC+04:00) |

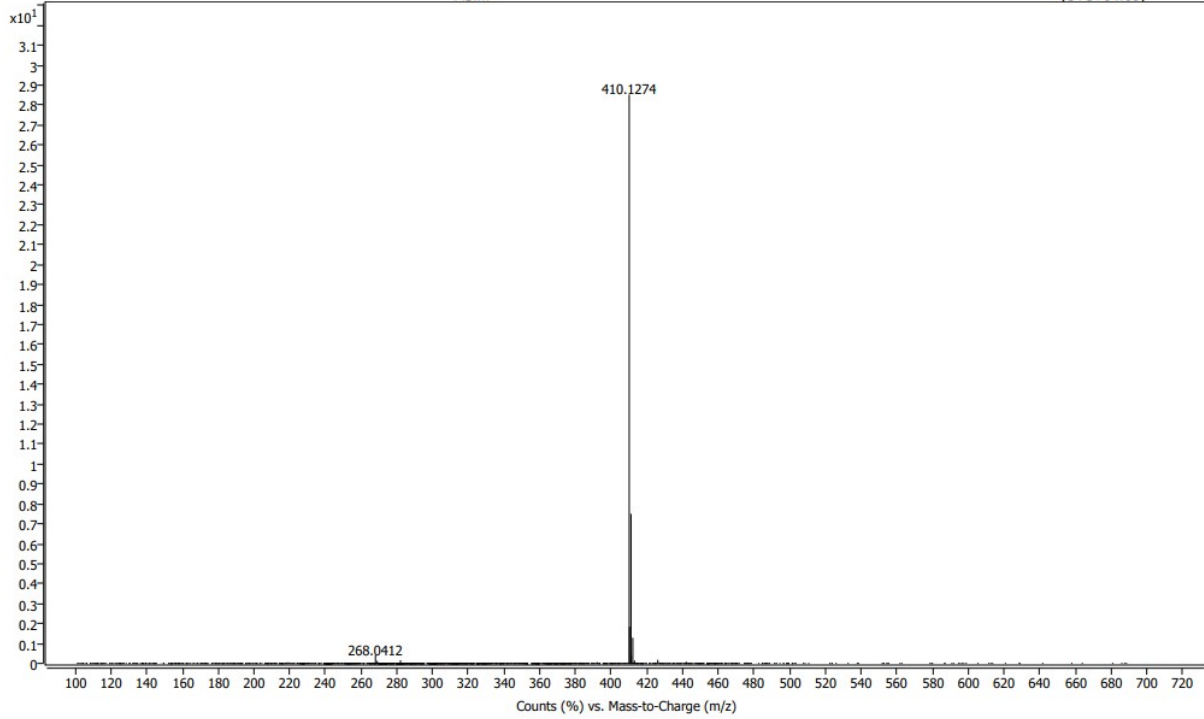

# Spectrum Plot Report

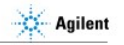

|              |                  |                |                       |            |              |                  |                                  |
|--------------|------------------|----------------|-----------------------|------------|--------------|------------------|----------------------------------|
| Sample Name  | ROXADUSTAT-VAL   | Rack Position  |                       | Instrument | Instrument 1 | Acq Operator     |                                  |
| Inj Vol (ul) | 10               | Plate Position |                       | IRM Status | Success      |                  |                                  |
| Data File    | ROXADUSTAT-VAL.d | Acq Method     | APCI POS ION ACN MS.m | Comment    |              | Acq Time (Local) | 19-Sep-24 9:42:51 AM (UTC+04:00) |

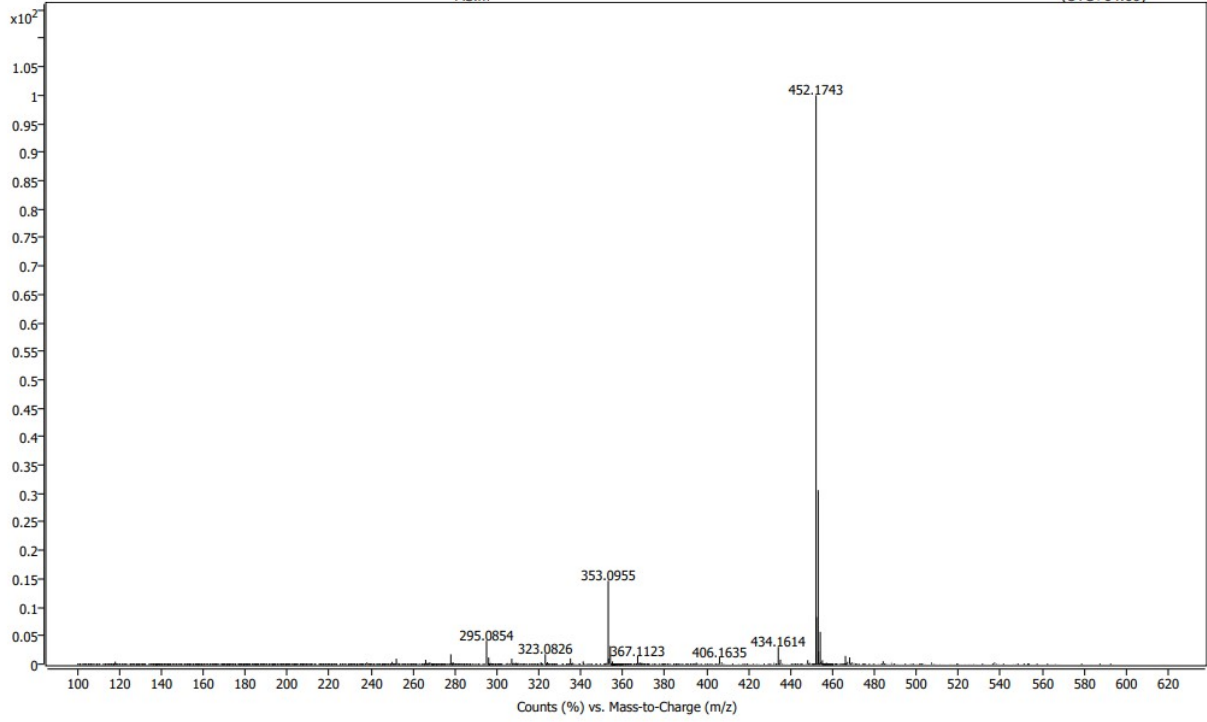

# Spectrum Plot Report

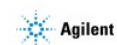

|              |                  |                |                       |              |                                                    |
|--------------|------------------|----------------|-----------------------|--------------|----------------------------------------------------|
| Sample Name  | ROXADUSTAT-LEV   | Rack Position  | Instrument            | Instrument 1 | Acq Operator                                       |
| Inj Vol (ul) | 10               | Plate Position | IRM Status            | Success      |                                                    |
| Data File    | ROXADUSTAT-LEV.d | Acq Method     | APCI POS ION ACN MS.m | Comment      | Acq Time (Local) 19-Sep-24 10:04:28 AM (UTC+04:00) |

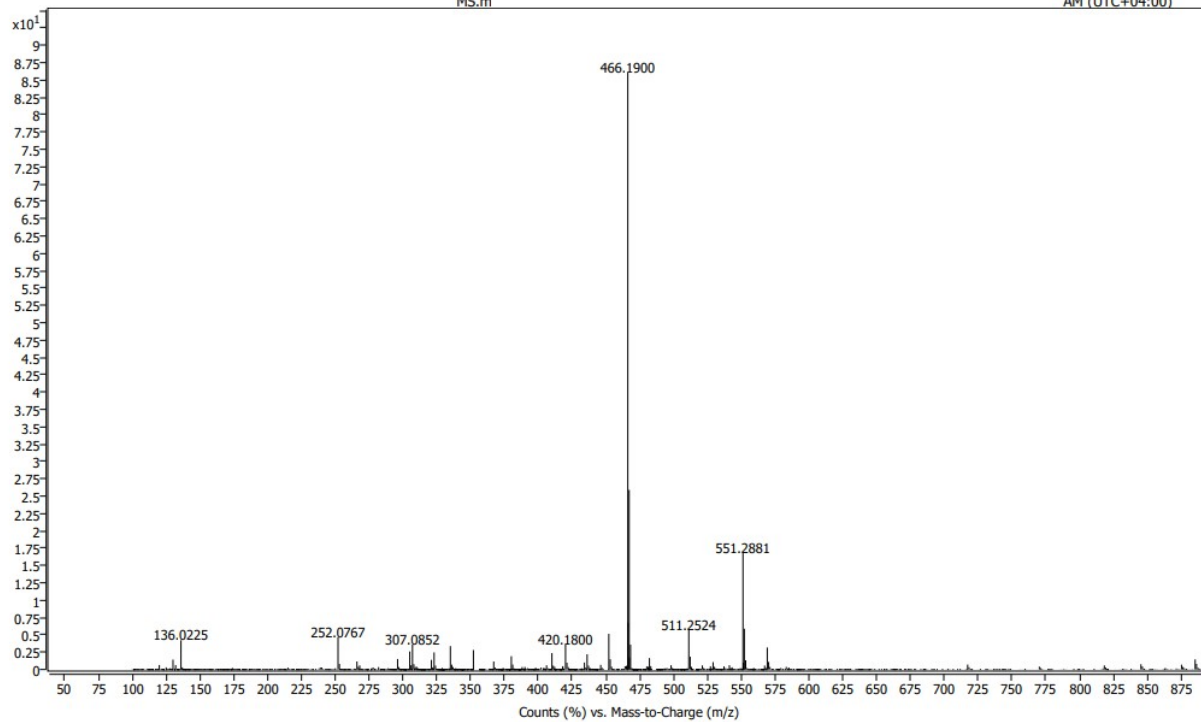

# Spectrum Plot Report

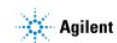

|              |                  |                |                          |              |                                                      |
|--------------|------------------|----------------|--------------------------|--------------|------------------------------------------------------|
| Sample Name  | ROXADUSTAT-SER   | Rack Position  | Instrument               | Instrument 1 | Acq Operator                                         |
| Inj Vol (ul) | 10               | Plate Position | IRM Status               | Success      |                                                      |
| Data File    | ROXADUSTAT-SER.d | Acq Method     | APCI POS ION ACN<br>MS.m | Comment      | Acq Time (Local) 18-Sep-24 5:13:24 PM<br>(UTC+04:00) |

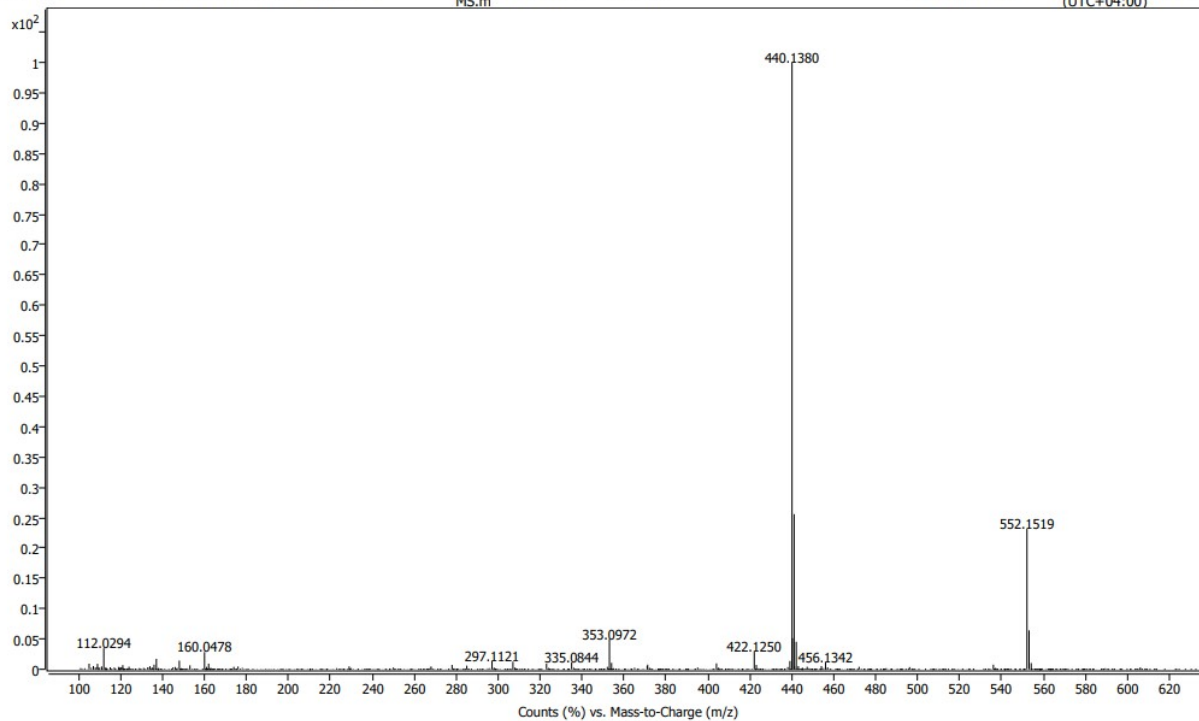

# Spectrum Plot Report

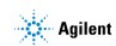

|              |                  |                |                       |            |              |                  |                                  |
|--------------|------------------|----------------|-----------------------|------------|--------------|------------------|----------------------------------|
| Sample Name  | ROXADUSTAT-MET   | Rack Position  |                       | Instrument | Instrument 1 | Acq Operator     |                                  |
| Inj Vol (ul) | 10               | Plate Position |                       | IRM Status | Success      |                  |                                  |
| Data File    | ROXADUSTAT-MET.d | Acq Method     | APCI POS ION ACN MS.m | Comment    |              | Acq Time (Local) | 19-Sep-24 9:59:01 AM (UTC+04:00) |

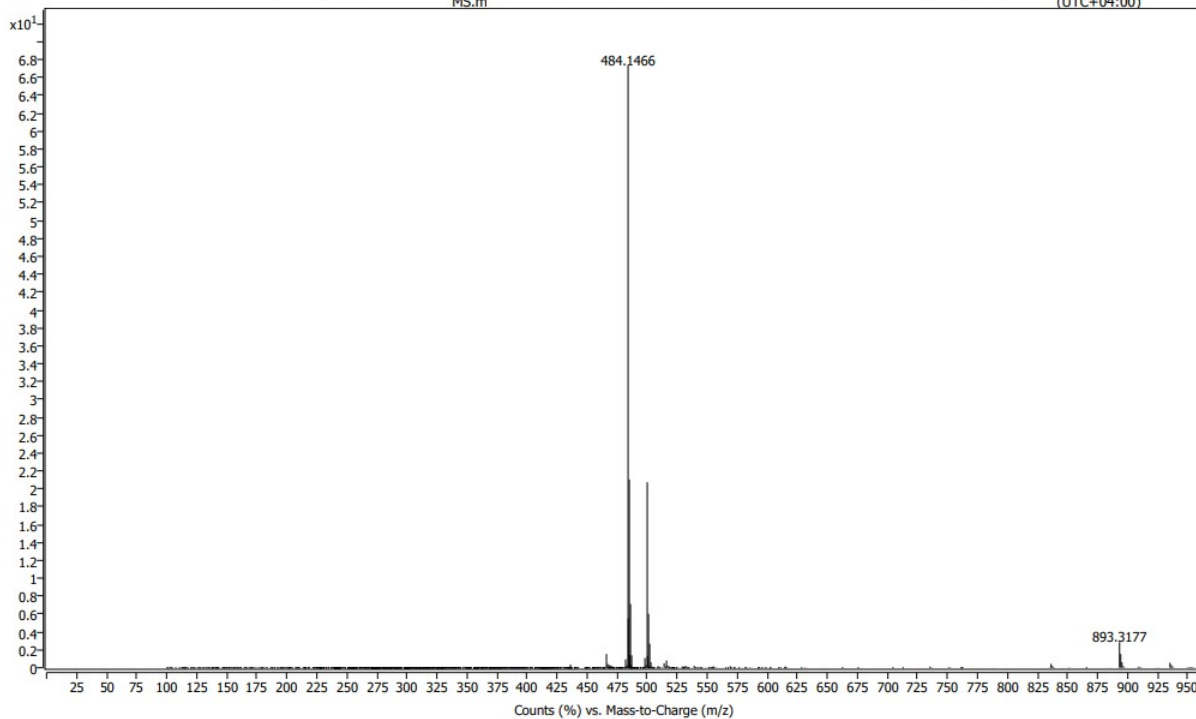

Supplement: d6md00094k1.pdf [file d6md00094k1.pdf]
